# Supplementary material for: Dasatinib, a Src inhibitor, sensitizes liver metastatic colorectal carcinoma to oxaliplatin in tumors with high levels of phospho-Src
Source: PubMed Central journal article supplement (PMC5078079; doi:10.18632/oncotarget.8880), 2016-04-20
Supplement: oncotarget-07-33111-s001.pdf [file oncotarget-07-33111-s001.pdf]

## Dasatinib, a Src inhibitor, sensitizes liver metastatic colorectal carcinoma to oxaliplatin in tumors with high levels of phospho-Src

### SUPPLEMENTARY FIGURE AND TABLE

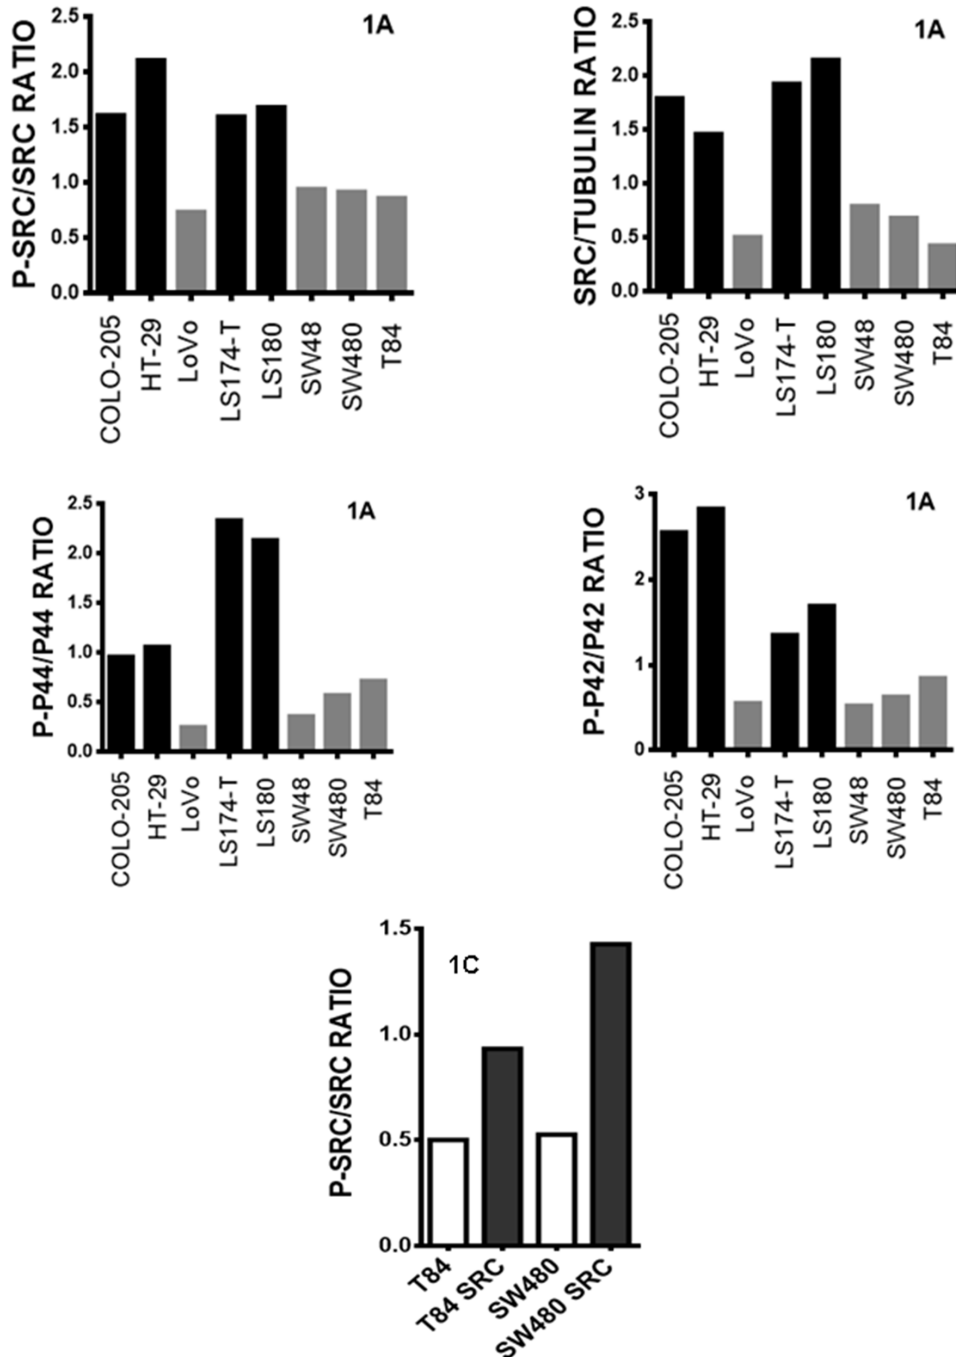

Supplementary Figure S1: Quantification of the protein levels of figure 1.

Supplementary Table S1: Mutational analysis of the CRC lines used in this study

| Cell line | Kras Mutation | Braf V600E | PIK3CA Mutation |
|-----------|---------------|------------|-----------------|
| COLO 205  | Wild type     | Mutated    | G914R           |
| HT29      | Wild type     | Mutated    | P449T           |
| LS174T    | G12D          | Wild type  | H1047R          |
| LS180     | G12D          | Wild type  | H1047R          |
| LOVO      | G13D          | Wild type  |                 |
| T84       | G13D          | Wild type  | E542K; H1047R   |
| SW480     | G12V          | Wild type  |                 |
| SW48      | Wild type     | Wild type  | G914R           |

The mutational status was obtained from COSMIC database and confirmed by our own mutational analysis.
